# Supplementary material for: Maintenance of glycaemic control with liraglutide versus oral antidiabetic drugs as add‐on therapies in patients with type 2 diabetes uncontrolled with metformin alone: A randomized clinical trial in primary care (LIRA‐PRIME)
Source: PubMed Central journal article supplement — Diabetes Obes Metab. 2021 Oct 18;24(2):204–11. doi: 10.1111/dom.14566 (PMC9298244; doi:10.1111/dom.14566), 2021-10-18
Supplement: DOM-24-204-s001.pdf [file DOM-24-204-s001.pdf]

# **Efficacy of Liraglutide versus Oral Antidiabetic Drugs in Patients with Type 2 Diabetes Uncontrolled with Metformin: A Randomized Clinical Trial in Primary Care (LIRA-PRIME)**

Jeff Unger MD, Dale C. Allison MD, Margit Kaltoft MD, Kavitha Lakkole MBA, Jayant K. Panda MD, Chethana Ramesh MSc, Mehmet Sargin MD, Elena Smolyarchuk MD, Melissa Twine BS, Benjamin Wolthers MD, Gizem Yarimbaz MSc, Marouan Zoghbi MD; on behalf of the LIRA-PRIME investigators

## **Online-only supplementary material**

### **Contents:**

#### **Methods**

**Figure S1.** Patient disposition

**Figure S2.** First and last dose of medication compared to defined daily dose

**Figure S3.** Change in HbA<sub>1c</sub> over time

**Figure S4.** Change in body weight over time

**Figure S5.** Changes in lipids over time

**Table S1.** Defined daily dose (DDD) for liraglutide and oral antidiabetics

**Table S2.** Oral antidiabetic medication distribution

**Table S3.** Demographics and baseline characteristics

**Table S4.** HbA<sub>1c</sub> at Week 104 or at premature treatment discontinuation

**Table S5.** Treatment-emergent hypoglycemic episodes

**Table S6.** Analysis of treatment-emergent hypoglycemic episodes using negative binomial regression

**Table S7.** Treatment-emergent adverse events leading to permanent discontinuation of trial product (by SOC and occurring in  $\geq 1\%$  of patients in any group)

**Table S8.** Change from baseline in biochemistry values (excluding amylase and lipase) at end of trial

**Table S9.** Amylase and lipase at Week 104 or at premature treatment discontinuation

**Table S10.** Demographics and baseline characteristics of the liraglutide and post hoc OAD subgroups

**Table S11.** Time to inadequate glycemic control and time to premature treatment discontinuation with liraglutide versus post hoc

OAD subgroups

**Table S12.** Change from baseline in HbA<sub>1c</sub> and body weight at Week 104 or at premature treatment discontinuation in liraglutide and post hoc OAD subgroups

**Table S13.** Treatment-emergent hypoglycemic episodes in liraglutide and post hoc OAD subgroups

**Table S14.** Treatment-emergent adverse events (serious, fatal, leading to permanent discontinuation and events of special interest) in liraglutide and post hoc OAD subgroups

**List of LIRA-PRIME investigators**

## Methods

### *Definition of serious adverse events*

A serious adverse event (AE) is an experience that at any medication dose results in any of the following:

- Death;
- A life-threatening<sup>a</sup> experience;
- In-patient hospitalization<sup>b</sup> or prolongation of existing hospitalization;
- A persistent or significant disability or incapacity;<sup>c</sup>
- A congenital anomaly or birth defect;
- Important medical events that may not result in death, be life-threatening,<sup>a</sup> or require hospitalization<sup>b</sup> may be considered as serious AEs when, based on appropriate medical judgement, they may jeopardize the patient and may require medical or surgical intervention to prevent one of the outcomes listed in the definition of serious AEs.<sup>d</sup>

Suspicion of transmission of infectious agents via the trial product must always be considered a serious AE.

<sup>a</sup>The term ‘life threatening’ in the definition of serious AE refers to an event in which the patient was at risk of death at the time of the event. It does not refer to an event that hypothetically might have caused death if it was more severe.

<sup>b</sup>The term ‘hospitalization’ is used when a patient:

- Is admitted to a hospital or in-patient facility, irrespective of the duration of physical stay; or
- Hospital stay for treatment or observation for more than 24 hours.

Medical judgement must always be exercised, and when in doubt, the hospital contact should be regarded as a hospitalization. Hospitalizations for administrative, trial-related and social purposes do not constitute AEs and should therefore not be reported as AEs or serious AEs. Hospital admissions for surgical procedures planned before trial inclusion are not considered AEs or serious AEs.

<sup>c</sup>A substantial disruption of a patient’s ability to conduct normal life functions (e.g. following the event or clinical investigation, the patient has significant, persistent or permanent change, impairment, damage or disruption in his/her body function or structure, physical activity and/or quality of life).

<sup>d</sup>For example, intensive treatment in an emergency room or at home for allergic bronchospasm, blood dyscrasias or convulsions that do not result in hospitalization, or development of drug dependency or drug abuse.

### *Definitions of treatment-emergent AEs and hypoglycemic episodes*

A treatment-emergent AE was defined as an event with an onset date (or increase in severity) on or after the first day of trial product administration and no later than 7 days after the last trial product administration. Hypoglycemic episodes were defined as treatment-emergent if their onset occurred on or after the first day of trial product administration and no later than the day after the last day of trial product administration.

### ***Inclusion criteria***

The full inclusion criteria were as follows:

- Informed consent obtained before trial-related activities;
- Aged  $\geq 18$  years at the time of signing informed consent;
- Clinical diagnosis of type 2 diabetes  $\geq 90$  days prior to the screening visit;
- Stable daily dose of metformin  $\geq 1500$  mg or maximum tolerated dose as monotherapy for  $\geq 60$  days prior to the screening visit;
- HbA<sub>1c</sub> 7.5–9.0% (59–75 mmol/mol) (both inclusive) measured  $\leq 90$  days prior to the screening visit;
- Patients in which Victoza<sup>®</sup> and oral antidiabetic drug (OAD) treatment are indicated according to approved local label.

### ***Exclusion criteria***

The full exclusion criteria were as follows:

- Previous participation in this trial, defined as signed informed consent;
- Pregnancy, breast-feeding, intention to become pregnant or of childbearing potential and not using adequate contraceptive methods (as required by local regulation or practice);
- Receipt of any investigational medicinal product within 30 days of screening;
- Treatment with any medication for the indication of diabetes other than metformin within 60 days of screening (except short-term treatment of  $\leq 7$  days in total) with insulin in connection with intercurrent illness.

### ***Sample size calculation***

The sample size was calculated to detect a difference in the time to inadequate glycemic control between the liraglutide and OAD arms with 90% power. The following assumptions were made:

- Mean post-baseline glycated hemoglobin (HbA<sub>1c</sub>) in liraglutide arm of 6.9% (51.9 mmol/mol) and standard deviation (SD) of the within-subject error of 0.85% (9.3 mmol/mol);
- Mean treatment difference in HbA<sub>1c</sub> of 0.3% (3.3 mmol/mol), which is considered clinically relevant;
- Divergence in HbA<sub>1c</sub> levels between the two treatment arms after Week 65;
- 20% of patients discontinuing treatment prematurely by Week 26 without having inadequate glycemic control. These patients were assumed to discontinue before the Week 26 visit and thus not to contribute to the primary analysis.

Figure S1. Patient disposition

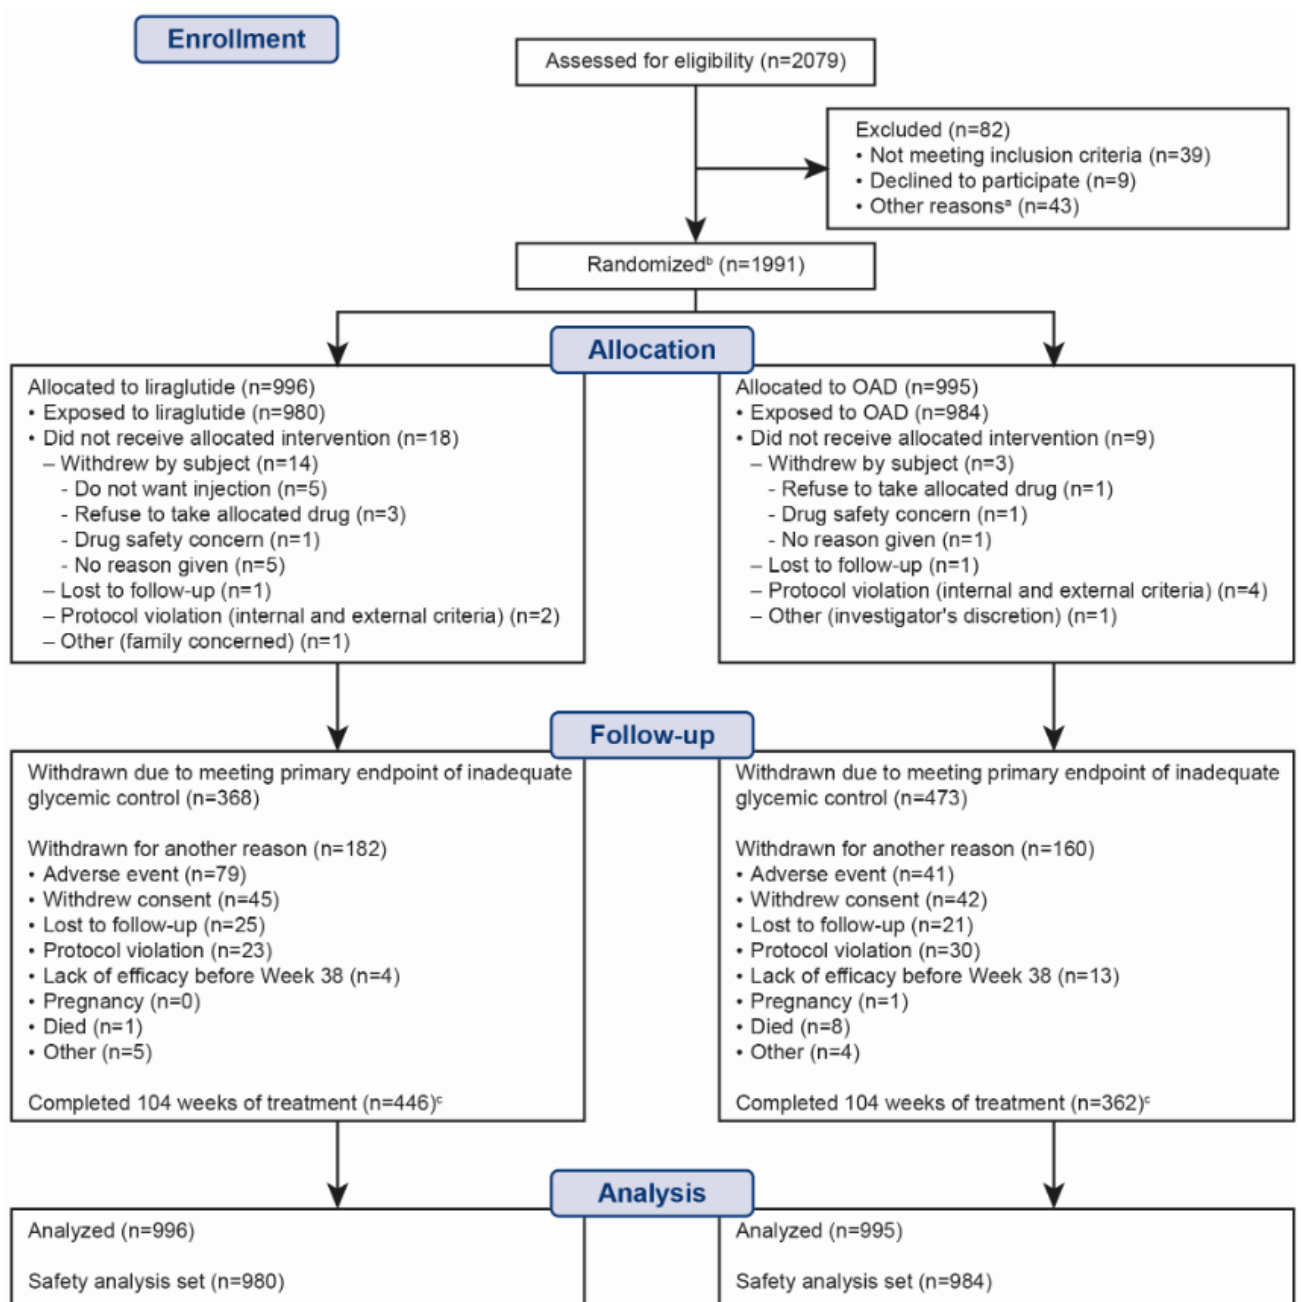

<sup>a</sup>“Other reasons” mostly included withdrawal of consent by the patient or lost to follow-up. <sup>b</sup>Six patients (n=3 patients from each arm) were excluded from all analyses as their casebooks were not signed by the investigator, which is legally binding. <sup>c</sup>Includes patients with inadequate glycemic control at Week 104. n, number of patients; OAD, oral antidiabetic drug.

**Figure S2: First and last dose of medication compared with defined daily dose****A. Liraglutide and OAD subgroups**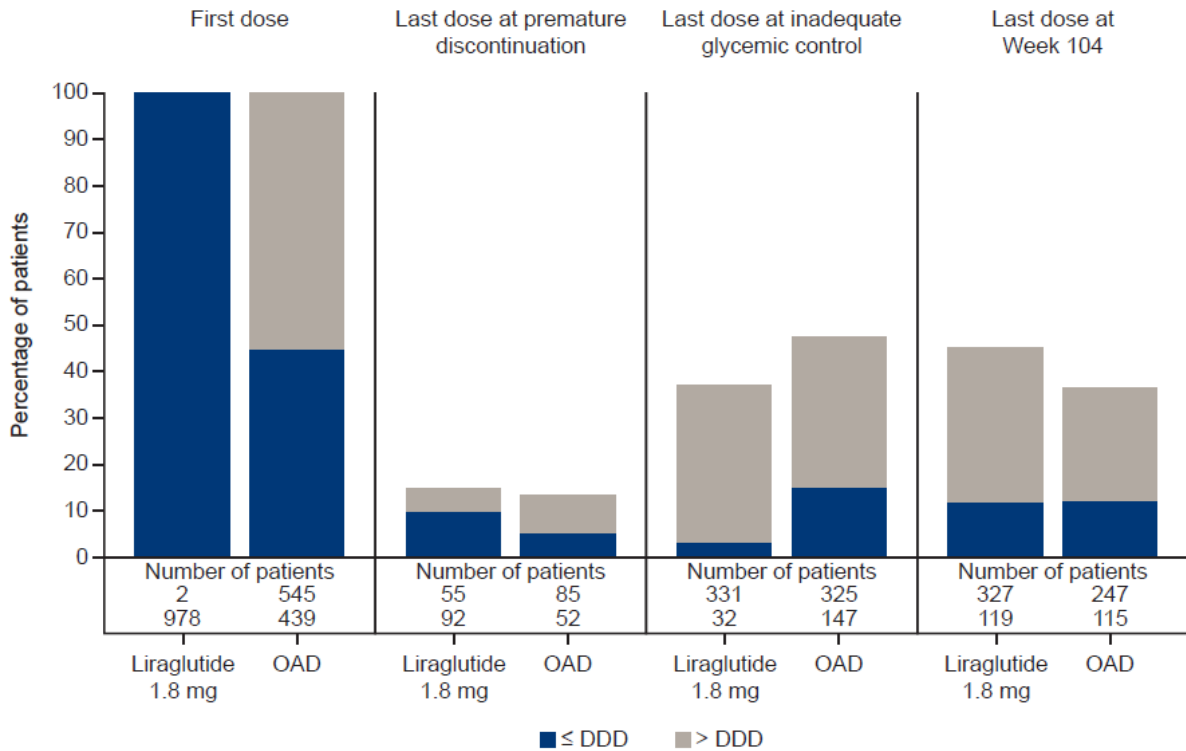

Safety analysis set. OADs included investigator-selected drugs from the classes:  $\alpha$ -glucosidase inhibitor, dipeptidyl peptidase-4 inhibitor, sodium-glucose cotransporter-2 inhibitor, sulfonylurea or thiazolidinedione. Inadequate glycemic control is defined as  $HbA_{1c} > 7.0\%$  (53 mmol/mol) at 2 consecutive scheduled visits after the first 26 weeks of treatment and up to 104 weeks. First possible occurrence at Week 38. Premature discontinuation includes discontinuation due to any reason other than inadequate glycemic control. Week 104 includes subjects who met inadequate glycemic control at Week 104. The DDD is the assumed average maintenance dose per day for a drug used for its main indication in adults. For the DDD per drug, see Supplementary Table S1. DDD, defined daily dose; disc., discontinuation; glyc., glycemic control; OAD, oral antidiabetic drug.

## B. Individual OAD class subgroups

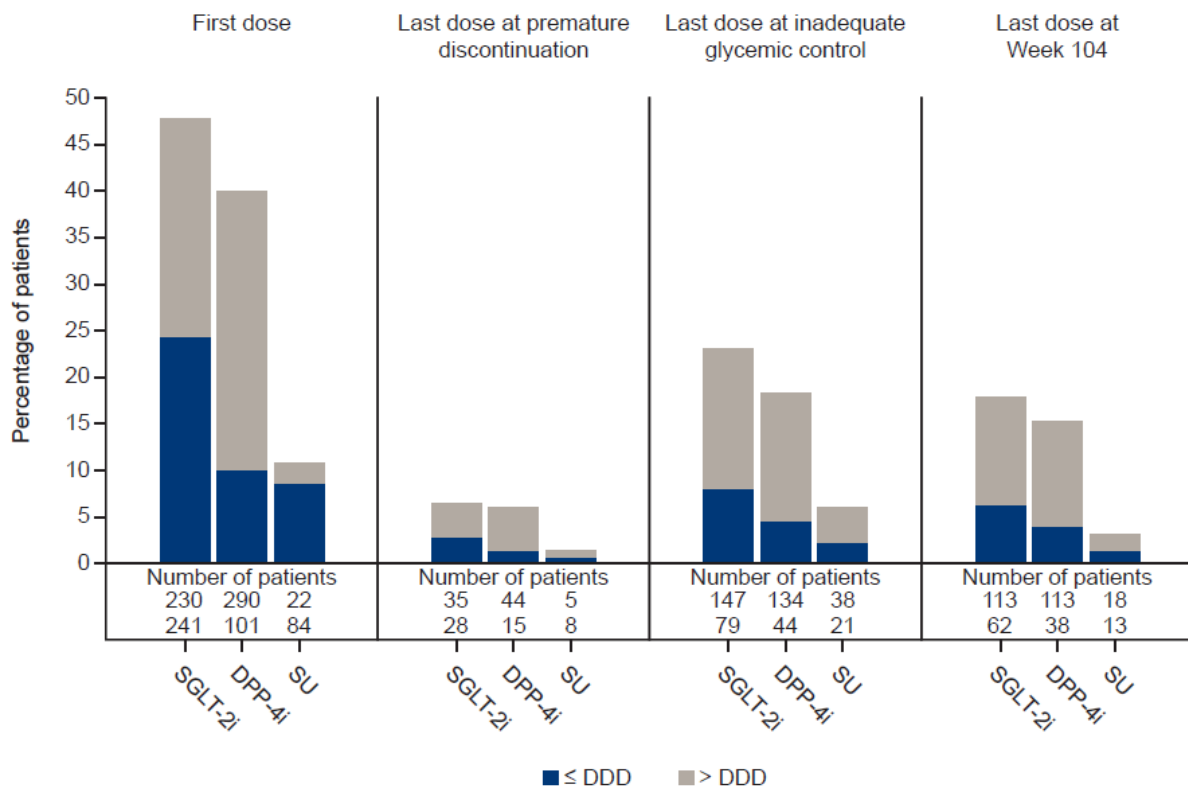

Safety analysis set. Inadequate glycemic control is defined as  $HbA_{1c} > 7.0\%$  (53 mmol/mol) at 2 consecutive scheduled visits after the first 26 weeks of treatment and up to 104 weeks. First possible occurrence at Week 38. Premature discontinuation includes discontinuation due to any reason other than inadequate glycemic control. Week 104 includes subjects who met inadequate glycemic control at Week 104. The DDD is the assumed average maintenance dose per day for a drug used for its main indication in adults. DDD, defined daily dose; disc., discontinuation; DPP-4i, dipeptidyl peptidase 4 inhibitor; glyc., glycemic control; SGLT2i, sodium-glucose cotransporter-1 inhibitor; SU, sulfonylurea.

**Figure S3. Change in HbA<sub>1c</sub> over time**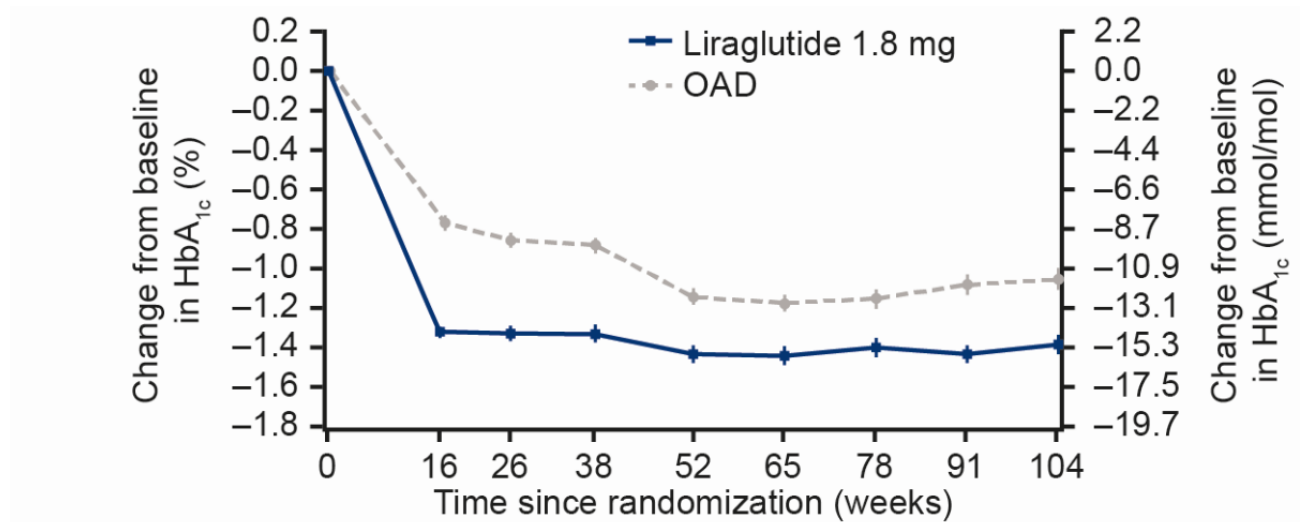

|                    |     |     |     |     |     |     |     |     |     |
|--------------------|-----|-----|-----|-----|-----|-----|-----|-----|-----|
| Liraglutide 1.8 mg | 975 | 873 | 848 | 820 | 625 | 567 | 514 | 480 | 404 |
| OAD                | 975 | 897 | 863 | 848 | 530 | 471 | 417 | 382 | 327 |

OADs included investigator-selected drugs from the classes:  $\alpha$ -glucosidase inhibitor, dipeptidyl peptidase-4 inhibitor, sodium-glucose cotransporter-2 inhibitor, sulfonylurea or thiazolidinedione; both liraglutide and OADs were prescribed in combination with metformin. Full analysis set. Data are mean  $\pm$  standard error of the mean. Numbers of patients contributing to the data points are shown in the bottom panel. HbA<sub>1c</sub>, glycated hemoglobin; OAD, oral antidiabetic drug.

**Figure S4. Change in body weight over time**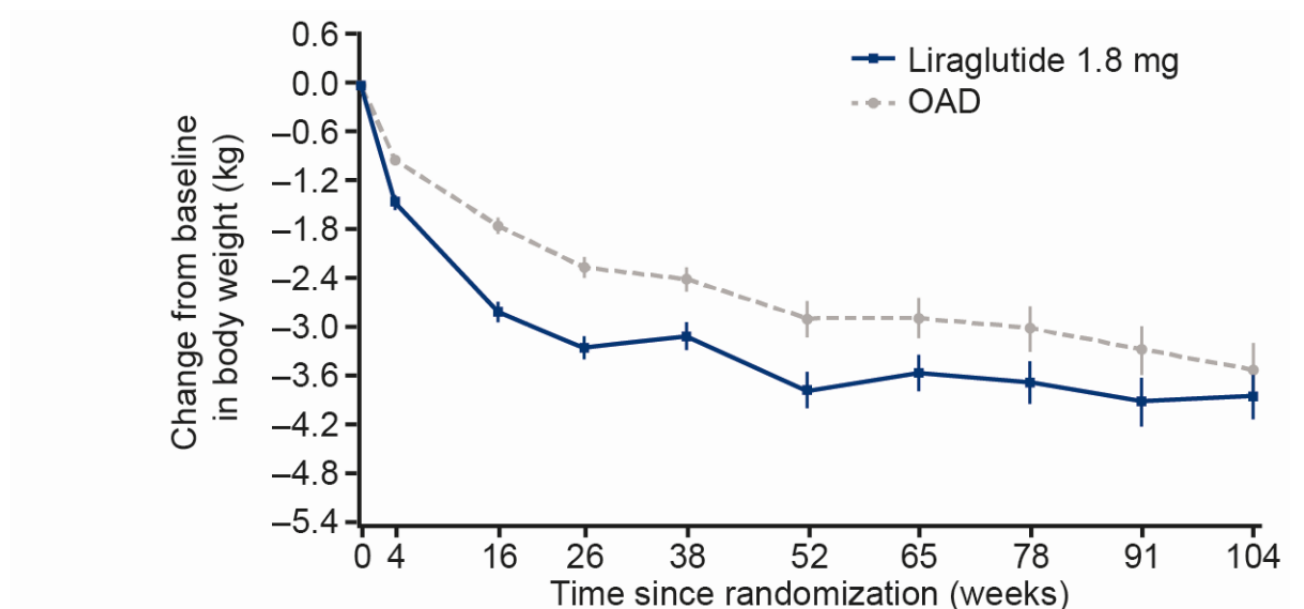

|                    |     |     |     |     |     |     |     |     |     |     |
|--------------------|-----|-----|-----|-----|-----|-----|-----|-----|-----|-----|
| Liraglutide 1.8 mg | 990 | 932 | 889 | 862 | 835 | 631 | 573 | 519 | 488 | 427 |
| OAD                | 987 | 953 | 910 | 878 | 858 | 536 | 478 | 422 | 386 | 349 |

OADs included investigator-selected drugs from the classes:  $\alpha$ -glucosidase inhibitor, dipeptidyl peptidase-4 inhibitor, sodium-glucose cotransporter-2 inhibitor, sulfonylurea or thiazolidinedione; both liraglutide and OADs were prescribed in combination with metformin. Full analysis set. Data are mean  $\pm$  standard error of the mean. Numbers of patients contributing to the data points are shown in the bottom panel. OAD, oral antidiabetic drug.

Figure S5. Changes in lipids over time

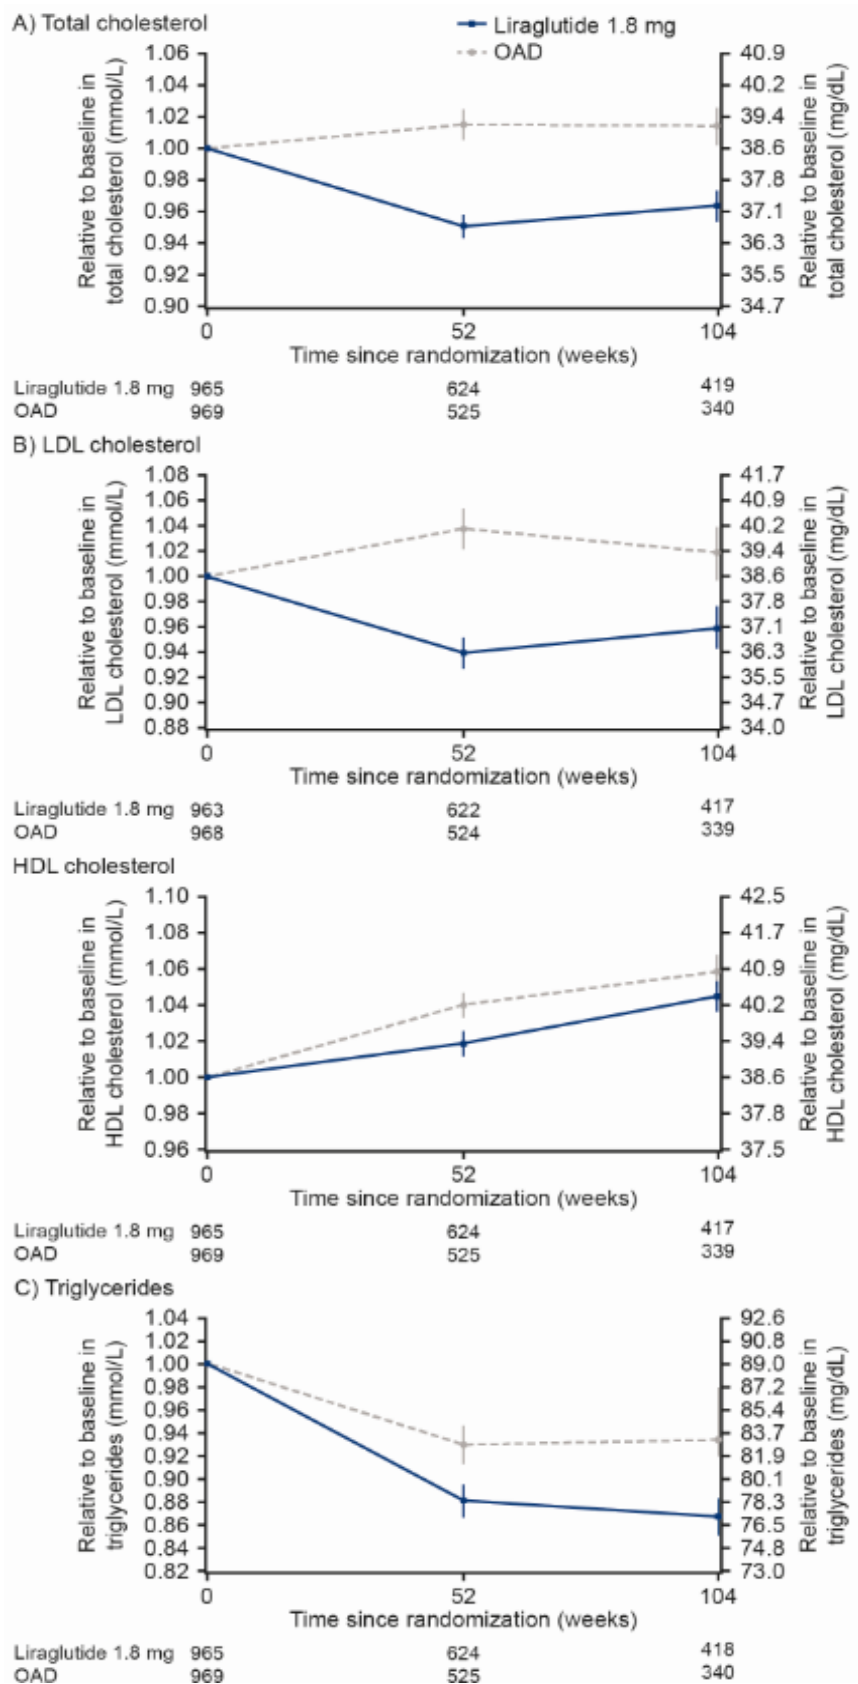

OADs included investigator-selected drugs from the classes:  $\alpha$ -glucosidase inhibitor, dipeptidyl peptidase-4 inhibitor, sodium-glucose cotransporter-2 inhibitor, sulfonylurea or thiazolidinedione; both liraglutide and OADs were prescribed in combination with metformin. Safety analysis set. Data are geometric means (symbols)  $\pm$  standard error of the mean on a log-scale, back transformed (error bars). Numbers of patients contributing to the data points are shown in the bottom panels. LDL cholesterol was largely calculated from total cholesterol,



HDL cholesterol, and triglycerides using the Friedewald formula. When triglycerides were  $>4.52$  mmol/L, direct LDL cholesterol was measured. HDL, high density lipoprotein; LDL, low density lipoprotein; OAD, oral antidiabetic drug.

**Table S1. Defined daily dose (DDD) for liraglutide and oral antidiabetics**

| Category and name                                  | ATC code | DDD     |
|----------------------------------------------------|----------|---------|
| GLP-1 RAs                                          |          |         |
| Liraglutide                                        | A10BJ02  | 1.2 mg  |
| Sulfonylureas                                      |          |         |
| Glibenclamide                                      | A10BB01  | 7 mg    |
| Chlorpropamide                                     | A10BB02  | 0.375 g |
| Tolbutamide                                        | A10BB03  | 1.5 g   |
| Tolazamide                                         | A10BB05  | 0.5 g   |
| Glipizide                                          | A10BB07  | 10 mg   |
| Gliquidone                                         | A10BB08  | 60 mg   |
| Gliclazide                                         | A10BB09  | 60 mg   |
| Glimepiride                                        | A10BB12  | 2 mg    |
| $\alpha$ -glucosidase inhibitors                   |          |         |
| Acarbose                                           | A10BF01  | 0.3 g   |
| Miglitol                                           | A10BF02  | 0.3 g   |
| Voglibose                                          | A10BF03  | 0.6 mg  |
| Thiazolidinediones                                 |          |         |
| Rosiglitazone                                      | A10BG02  | 6 mg    |
| Pioglitazone AT                                    | A10BG03  | 30 mg   |
| Dipeptidyl peptidase-4 inhibitors                  |          |         |
| Sitagliptin                                        | A10BH01  | 0.1 g   |
| Vildagliptin                                       | A10BH02  | 0.1 g   |
| Saxagliptin                                        | A10BH03  | 5 mg    |
| Alogliptin                                         | A10BH04  | 25 mg   |
| Teneligliptin                                      | A10BH08  | 20 mg   |
| Linagliptin                                        | A10BH05  | 5 mg    |
| SGLT-2 inhibitors                                  |          |         |
| Dapagliflozin                                      | A10BK01  | 10 mg   |
| Canagliflozin                                      | A10BK02  | 0.2 g   |
| Empagliflozin                                      | A10BK03  | 17.5 mg |
| Other blood glucose-lowering drugs, excl. insulins |          |         |
| Repaglinide                                        | A10BX02  | 4 mg    |
| Nateglinide                                        | A10BX03  | 0.36 g  |

The defined daily dose (DDD) is the assumed average maintenance dose per day or a drug used for its main indication in adults. The DDD is a unit of measurement and does not necessarily reflect the recommended or prescribed daily dose. Values of DDD given in the table were taken from the World Health Organization (WHO) website at the time the trial was carried out. Please refer to [https://www.whooc.no/atc\\_ddd\\_index/](https://www.whooc.no/atc_ddd_index/) for more information. ATC code, Anatomical Therapeutic Chemical code; GLP-1 RA, glucagon-like peptide-1 receptor agonist; SGLT2, sodium-glucose co-transporter-2.

**Table S2. Oral antidiabetic medication distribution**

|                                 | <b>OAD, N (%)</b> |
|---------------------------------|-------------------|
| Full analysis set               | 984 (100.0)       |
| SGLT-2 inhibitor                | 471 (47.9)        |
| DPP-4 inhibitor                 | 391 (39.7)        |
| Sulfonylurea                    | 106 (10.8)        |
| Thiazolidinedione               | 11 (1.1)          |
| $\alpha$ -glucosidase inhibitor | 5 (0.5)           |

The allocated OAD was chosen by the investigator; OADs in the following classes were prescribed in the study:  $\alpha$ -glucosidase inhibitor, DPP-4i, SGLT-2i, sulfonylurea or thiazolidinedione. DPP-4, dipeptidyl peptidase-4; N, number of patients; OAD, oral antidiabetic drug; SGLT-2, sodium-glucose cotransporter-2; %, percentage of patients.

**Table S3. Demographics and baseline characteristics of liraglutide and OAD subgroups**

|                                                  | <b>Liraglutide</b> | <b>OAD</b>  | <b>Total</b> |
|--------------------------------------------------|--------------------|-------------|--------------|
| Full analysis set, N                             | 996                | 995         | 1991         |
| <b>Sex</b>                                       |                    |             |              |
| Female, N (%) <sup>a</sup>                       | 476 (47.8)         | 471 (47.3)  | 947 (47.6)   |
| Male, N (%)                                      | 520 (52.2)         | 524 (52.7)  | 1044 (52.4)  |
| Age (years)                                      | 57.6 (11.0)        | 57.1 (10.7) | 57.4 (10.8)  |
| Body weight (kg)                                 | 93.8 (23.5)        | 95.9 (25.3) | 94.8 (24.4)  |
| BMI (kg/m <sup>2</sup> )                         | 33.2 (7.2)         | 33.7 (7.6)  | 33.5 (7.4)   |
| Diabetes duration (years)                        | 7.3 (5.9)          | 7.1 (5.9)   | 7.2 (5.9)    |
| HbA <sub>1c</sub> (%)                            | 8.2 (1.0)          | 8.1 (0.9)   | 8.2 (1.0)    |
| HbA <sub>1c</sub> (mmol/mol)                     | 66.0 (11.0)        | 65.5 (10.3) | 65.7 (10.7)  |
| FPG (mmol/L)                                     | 9.5 (2.8)          | 9.4 (2.7)   | 9.5 (2.7)    |
| Metformin ≥1500 mg, N (%)                        | 886 (89.0)         | 887 (89.1)  | 1773 (89.1)  |
| eGFR (mL/min/1.73m <sup>2</sup> )                | 94.7 (26.6)        | 96.0 (26.3) | 95.4 (26.4)  |
| <b>Diabetes complications,<sup>b</sup> N (%)</b> |                    |             |              |
| Diabetic nephropathy                             | 51 (5.1)           | 41 (4.1)    | 92 (4.6)     |
| Diabetic neuropathy                              | 160 (16.1)         | 145 (14.6)  | 305 (15.3)   |
| Diabetic retinopathy                             | 40 (4.0)           | 26 (2.6)    | 66 (3.3)     |
| Macroangiopathy                                  | 61 (6.1)           | 41 (4.1)    | 102 (5.1)    |
| <b>Race</b>                                      |                    |             |              |
| White                                            | 724 (72.7)         | 714 (71.8)  | 1438 (72.2)  |
| Asian                                            | 149 (15.0)         | 141 (14.2)  | 290 (14.6)   |
| Black or African American                        | 101 (10.1)         | 106 (10.7)  | 207 (10.4)   |
| American Indian or Alaska Native                 | 3 (0.3)            | 6 (0.6)     | 9 (0.5)      |
| Native Hawaiian or Other Pacific Islander        | 3 (0.3)            | 2 (0.2)     | 5 (0.3)      |
| Other                                            | 16 (1.6)           | 26 (2.6)    | 42 (2.1)     |
| <b>Ethnicity</b>                                 |                    |             |              |
| Hispanic or Latino                               | 176 (17.7)         | 189 (19.0)  | 365 (18.3)   |
| Not Hispanic or Latino                           | 820 (82.3)         | 806 (81.0)  | 1626 (81.7)  |
| <b>Smoking status</b>                            |                    |             |              |
| Never smoked                                     | 628 (63.1)         | 581 (58.4)  | 1209 (60.7)  |
| Previous smoker                                  | 217 (21.8)         | 243 (24.4)  | 460 (23.1)   |
| Current smoker                                   | 151 (15.2)         | 171 (17.2)  | 322 (16.2)   |

Full analysis set. Data are mean (SD) unless otherwise stated. <sup>a</sup>Investigators also documented whether females were of childbearing potential, as this was relevant to an exclusion criterion. <sup>b</sup>Data for diabetes complications are from the screening visit. BMI, body mass index; eGFR, estimated glomerular filtration rate calculated using the Modification of Diet in Renal Disease equation; FPG, fasting plasma glucose; HbA<sub>1c</sub>, glycated hemoglobin; N, number of patients; OAD, oral antidiabetic drug; SD, standard deviation.

**Table S4. HbA<sub>1c</sub> at Week 104 or at premature treatment discontinuation**

|                                                           | <b>Liraglutide</b>   | <b>OAD<sup>†</sup></b> | <b>P-value</b> |
|-----------------------------------------------------------|----------------------|------------------------|----------------|
| Full analysis set, N                                      | 996                  | 995                    |                |
| <b>Analysis of covariance model</b>                       |                      |                        |                |
| N                                                         | 872                  | 900                    |                |
| HbA <sub>1c</sub> , %                                     |                      |                        |                |
| Estimated LS mean (SE)                                    | 7.17 (0.037)         | 7.50 (0.036)           |                |
| Estimated LS mean (SE) change from baseline               | -0.99 (0.037)        | -0.66 (0.036)          |                |
| Estimated liraglutide – OAD treatment difference (95% CI) | -0.33 (-0.43; -0.23) |                        | <0.0001        |
| HbA <sub>1c</sub> , mmol/mol                              |                      |                        |                |
| Estimated LS mean (SE)                                    | 54.83 (0.400)        | 58.45 (0.394)          |                |
| Estimated LS mean (SE) change from baseline               | -10.80 (0.400)       | -7.18 (0.394)          |                |
| Estimated liraglutide – OAD treatment difference (95% CI) | -3.62 (-4.73; -2.52) |                        | <0.0001        |
| <b>Mixed model for repeated measures</b>                  |                      |                        |                |
| N                                                         | 877                  | 901                    |                |
| HbA <sub>1c</sub> , %                                     |                      |                        |                |
| Estimated LS mean (SE)                                    | 7.12 (0.044)         | 7.46 (0.048)           |                |
| Estimated LS mean (SE) change from baseline               | -0.90 (0.044)        | -0.57 (0.048)          |                |
| Estimated liraglutide – OAD treatment difference (95% CI) | -0.34 (-0.47; -0.21) |                        | <0.0001        |
| HbA <sub>1c</sub> , mmol/mol                              |                      |                        |                |
| Estimated LS mean (SE)                                    | 54.36 (0.484)        | 58.07 (0.523)          |                |
| Estimated LS mean (SE) change from baseline               | -9.89 (0.484)        | -6.18 (0.523)          |                |
| Estimated liraglutide – OAD treatment difference (95% CI) | -3.70 (-5.09; -2.31) |                        | <0.0001        |

<sup>†</sup>OADs included investigator-selected drugs from the classes:  $\alpha$ -glucosidase inhibitor, dipeptidyl peptidase-4 inhibitor, sodium-glucose cotransporter-2 inhibitor, sulfonylurea or thiazolidinedione; both liraglutide and OADs were prescribed in combination with metformin. Full analysis set. HbA<sub>1c</sub> and change from baseline in HbA<sub>1c</sub> at Week 104 or at premature treatment discontinuation were analyzed 1) using an analysis of covariance model with treatment and country as fixed factors and baseline HbA<sub>1c</sub> as a covariate and 2) using a linear mixed model for repeated measures with an unstructured residual covariance matrix and including treatment arm as a fixed factor and baseline HbA<sub>1c</sub> as a covariate. Two-sided P-value for test of no treatment difference. CI, confidence interval; HbA<sub>1c</sub>, glycated hemoglobin; LS, least squares; N, number of patients contributing to the analysis; OAD, oral antidiabetic drug; SE, standard error of the mean.

**Table S5. Treatment-emergent hypoglycemic episodes**

|                                    | Liraglutide |      |     |       | OAD <sup>†</sup> |      |     |       |
|------------------------------------|-------------|------|-----|-------|------------------|------|-----|-------|
|                                    | N           | %    | E   | R     | N                | %    | E   | R     |
| Safety analysis set                | 980         |      |     |       | 984              |      |     |       |
| Events                             | 113         | 11.5 | 224 | 165.3 | 101              | 10.3 | 315 | 250.3 |
| Severe or BG-confirmed symptomatic | 18          | 1.8  | 24  | 17.7  | 21               | 2.1  | 44  | 35.0  |
| Severe or BG-confirmed             | 26          | 2.7  | 32  | 23.6  | 27               | 2.7  | 52  | 41.3  |
| ADA classification                 |             |      |     |       |                  |      |     |       |
| Severe                             | 1           | 0.1  | 1   | 0.7   | 6                | 0.6  | 6   | 4.8   |
| Asymptomatic                       | 38          | 3.9  | 47  | 34.7  | 37               | 3.8  | 100 | 79.5  |
| Documented symptomatic             | 50          | 5.1  | 98  | 72.3  | 53               | 5.4  | 155 | 123.2 |
| Pseudo                             | 24          | 2.4  | 31  | 22.9  | 17               | 1.7  | 32  | 25.4  |
| Probable symptomatic               | 32          | 3.3  | 45  | 33.2  | 13               | 1.3  | 21  | 16.7  |
| Unclassifiable                     | 1           | 0.1  | 2   | 1.5   | 1                | 0.1  | 1   | 0.8   |

<sup>†</sup>OADs included investigator-selected drugs from the classes:  $\alpha$ -glucosidase inhibitor, dipeptidyl peptidase-4 inhibitor, sodium-glucose cotransporter-2 inhibitor, sulfonylurea or thiazolidinedione. Both liraglutide and OADs were prescribed in combination with metformin. Safety analysis set. A treatment-emergent hypoglycemic event was defined as an event with an onset date on or after the first day of trial product administration, and no later than the day after the last trial product administration. Prespecified endpoints involving hypoglycemic episodes are listed in the Methods section. Due to differences in exposure time between the liraglutide and OAD groups (1355.5 vs 1258.5 PYE, respectively), R is the most relevant parameter for between-group comparisons. ADA, American Diabetes Association; BG, blood glucose; E, number of events; N, number of patients with  $\geq 1$  event; OAD, oral antidiabetic drug; PYE, patient-years of exposure (1 PYE = 365.25 days); R, rate (number of events divided by patient-years of exposure multiplied by 1000); %, percentage of patients with  $\geq 1$  event.

**Table S6. Analysis of treatment-emergent hypoglycemic episodes using negative binomial regression**

|                                             | Liraglutide – OAD ratio | 95% CI       | P-value <sup>a</sup> |
|---------------------------------------------|-------------------------|--------------|----------------------|
| Severe episodes (ADA)                       | 0.154                   | 0.019; 1.284 | 0.08                 |
| Severe or BG-confirmed symptomatic episodes | 0.589                   | 0.310; 1.118 | 0.11                 |
| Documented symptomatic episodes (ADA)       | 0.607                   | 0.358; 1.029 | 0.06                 |

OADs included investigator-selected drugs from the classes:  $\alpha$ -glucosidase inhibitor, dipeptidyl peptidase-4 inhibitor, sodium-glucose cotransporter-2 inhibitor, sulfonylurea or thiazolidinedione. Both liraglutide and OADs were prescribed in combination with metformin. Safety analysis set. <sup>a</sup>Two-sided P-value for test of no treatment difference. The number of events was analyzed using a negative binomial regression model (log link) with the logarithm of the treatment-emergent exposure time (1000 years) as an offset. The model included treatment as a fixed factor and baseline HbA<sub>1c</sub> as a covariate. ADA, American Diabetes Association; BG, blood glucose; CI, confidence interval; OAD, oral antidiabetic drug.

**Table S7. Treatment-emergent adverse events leading to permanent discontinuation of trial product (by SOC and occurring in  $\geq 1\%$  of patients in any group)**

|                                                      | Liraglutide |     |     |       | OAD <sup>†</sup> |     |    |      |
|------------------------------------------------------|-------------|-----|-----|-------|------------------|-----|----|------|
|                                                      | N           | %   | E   | R     | N                | %   | E  | R    |
| Events                                               | 77          | 7.9 | 188 | 138.7 | 41               | 4.2 | 98 | 77.9 |
| Gastrointestinal disorders                           | 54          | 5.5 | 101 | 74.5  | 9                | 0.9 | 14 | 11.1 |
| Nervous system disorders                             | 12          | 1.2 | 15  | 11.1  | 7                | 0.7 | 13 | 10.3 |
| Infections and infestations                          | 6           | 0.6 | 6   | 4.4   | 10               | 1.0 | 12 | 9.5  |
| General disorders and administration site conditions | 11          | 1.1 | 11  | 8.1   | 3                | 0.3 | 4  | 3.2  |

<sup>†</sup>OADs included investigator-selected drugs from the classes:  $\alpha$ -glucosidase inhibitor, dipeptidyl peptidase-4 inhibitor, sodium-glucose cotransporter-2 inhibitor, sulfonylurea or thiazolidinedione. Both liraglutide and OADs were prescribed in combination with metformin. Safety analysis set. Treatment-emergent adverse event: defined as an event with an onset date (or increase in severity) on or after the first day of trial product administration, and no later than 7 days after the last trial product administration. E, number of events; N, number of patients with  $\geq 1$  event; OAD, oral antidiabetic drug; R, rate (number of events divided by patient-years of exposure multiplied by 1000); SOC, system organ class; %, percentage of patients with  $\geq 1$  event.

**Table S8. Change from baseline in biochemistry values (excluding amylase and lipase) at end of trial**

| Parameter                          | Liraglutide  | OAD <sup>†</sup> |
|------------------------------------|--------------|------------------|
| Safety analysis set, N             | 980          | 984              |
| Alanine aminotransferase, U/L      | -3.4 (17.05) | -2.9 (15.91)     |
| Aspartate aminotransferase, U/L    | -1.4 (13.35) | -1.0 (11.27)     |
| Creatinine, $\mu\text{mol/L}$      | 2.4 (12.18)  | 1.7 (12.52)      |
| eGFR, mL/min/SSA                   | -3.3 (17.73) | -2.2 (14.95)     |
| Potassium, mmol/L                  | -0.1 (0.60)  | -0.0 (0.60)      |
| Total bilirubin, $\mu\text{mol/L}$ | 0.3 (4.01)   | 0.3 (3.57)       |

<sup>†</sup>OADs included investigator-selected drugs from the classes:  $\alpha$ -glucosidase inhibitor, dipeptidyl peptidase-4 inhibitor, sodium-glucose cotransporter-2 inhibitor, sulfonylurea or thiazolidinedione. Both liraglutide and OADs were prescribed in combination with metformin. Safety analysis set. Data are mean (SD). eGFR, estimated glomerular filtration rate calculated using the Modification of Diet in Renal Disease equation; N, number of patients; OAD, oral antidiabetic drug; SD, standard deviation; SSA, specific surface area.

**Table S9. Amylase and lipase at Week 104 or at premature treatment discontinuation**

|                        | <b>Liraglutide</b> | <b>OAD<sup>†</sup></b> |
|------------------------|--------------------|------------------------|
| Safety analysis set, N | 980                | 984                    |
| <b>Amylase, U/L</b>    |                    |                        |
| N                      | 624                | 526                    |
| Median                 | 7.0                | 4.0                    |
| Min; max               | -353.0; 147.0      | -131.0; 212.0          |
| <b>Lipase, U/L</b>     |                    |                        |
| N                      | 624                | 526                    |
| Median                 | 9.0                | 1.0                    |
| Min; max               | -766.0; 448.0      | -486.0; 338.0          |

<sup>†</sup>OADs included investigator-selected drugs from the classes:  $\alpha$ -glucosidase inhibitor, dipeptidyl peptidase-4 inhibitor, sodium-glucose cotransporter-2 inhibitor, sulfonylurea or thiazolidinedione Both liraglutide and OADs were prescribed in combination with metformin. Safety analysis set. Amylase/lipase and changes from baseline in amylase/lipase at Week 104 or at premature treatment discontinuation were analyzed using an analysis of covariance model with treatment and country as fixed factors, and the baseline value of the variable of interest as a covariate. The response and baseline values included in the analysis were log transformed, due to distribution of these parameters. Two-sided *P*-value for test of no treatment difference. CI, confidence interval; N, number of patients contributing to the analysis; OAD, oral antidiabetic drug.



**Table S10. Demographics and baseline characteristics of the liraglutide and *post hoc* OAD subgroups**

|                                           | <b>Liraglutide</b> | <b>SGLT-2i</b> | <b>DPP-4i</b> | <b>SU</b>   |
|-------------------------------------------|--------------------|----------------|---------------|-------------|
| Full analysis set, N                      | 996                | 471            | 391           | 106         |
| <b>Sex</b>                                |                    |                |               |             |
| Female, N (%) <sup>a</sup>                | 476 (47.8)         | 218 (46.3)     | 195 (49.9)    | 45 (42.5)   |
| Male, N (%)                               | 520 (52.2)         | 253 (53.7)     | 196 (50.1)    | 61 (57.5)   |
| Age (years)                               | 57.6 (11.0)        | 56.7 (10.5)    | 57.4 (10.9)   | 57.7 (10.9) |
| Body weight (kg)                          | 93.8 (23.5)        | 98.8 (25.1)    | 94.2 (25.6)   | 91.2 (24.7) |
| BMI (kg/m <sup>2</sup> )                  | 33.2 (7.2)         | 34.4 (7.5)     | 33.6 (7.7)    | 32.0 (7.7)  |
| Diabetes duration (years)                 | 7.3 (5.9)          | 6.9 (5.7)      | 7.6 (6.3)     | 6.7 (5.2)   |
| HbA <sub>1c</sub> (%)                     | 8.2 (1.0)          | 8.2 (0.9)      | 8.1 (0.9)     | 8.3 (1.0)   |
| HbA <sub>1c</sub> (mmol/mol)              | 66.0 (11.0)        | 65.8 (10.3)    | 64.6 (10.3)   | 67.7 (10.9) |
| FPG (mmol/L)                              | 9.5 (2.8)          | 9.5 (2.7)      | 9.3 (2.6)     | 9.7 (3.0)   |
| Metformin ≥1500 mg, N (%)                 | 886 (89.0)         | 423 (89.8)     | 347 (88.7)    | 94 (88.7)   |
| eGFR (mL/min/1.73m <sup>2</sup> )         | 94.7 (26.6)        | 95.7 (24.5)    | 96.7 (28.2)   | 94.9 (27.1) |
| <b>Race</b>                               |                    |                |               |             |
| White                                     | 724 (72.7)         | 338 (71.8)     | 296 (75.7)    | 60 (56.6)   |
| Asian                                     | 149 (15.0)         | 69 (14.6)      | 43 (11.0)     | 23 (21.7)   |
| Black or African American                 | 101 (10.1)         | 48 (10.2)      | 37 (9.5)      | 20 (18.9)   |
| American Indian or Alaska Native          | 3 (0.3)            | 1 (0.2)        | 3 (0.8)       | 2 (1.9)     |
| Native Hawaiian or Other Pacific Islander | 3 (0.3)            | 1 (0.2)        | 0             | 1 (0.9)     |
| Other                                     | 16 (1.6)           | 14 (3.0)       | 12 (3.1)      | 0           |
| <b>Ethnicity</b>                          |                    |                |               |             |
| Hispanic or Latino                        | 176 (17.7)         | 76 (16.1)      | 82 (21.0)     | 23 (21.7)   |
| Not Hispanic or Latino                    | 820 (82.3)         | 395 (83.9)     | 309 (79.0)    | 83 (78.3)   |
| <b>Smoking status</b>                     |                    |                |               |             |
| Never smoked                              | 628 (63.1)         | 276 (58.6)     | 229 (58.6)    | 59 (55.7)   |
| Previous smoker                           | 217 (21.8)         | 113 (24.0)     | 94 (24.0)     | 27 (25.5)   |
| Current smoker                            | 151 (15.2)         | 82 (17.4)      | 68 (17.4)     | 20 (18.9)   |

Both liraglutide and OADs were prescribed in combination with metformin. Full analysis set. Data are mean (SD) unless otherwise stated. SGLT-2i, DPP-4i and SU were the three most commonly prescribed OADs in the LIRA-PRIME trial. Other OADs prescribed were thiazolidinedione (n=11) and  $\alpha$ -glucosidase inhibitor (n=5).

<sup>a</sup>Investigators also documented whether females were of childbearing potential, as this was relevant to an exclusion criterion. BMI, body mass index; DPP-4i, dipeptidyl peptidase-4 inhibitor; eGFR, estimated glomerular filtration rate calculated using the Modification of Diet in Renal Disease equation; FPG, fasting plasma glucose; HbA<sub>1c</sub>, glycosylated hemoglobin; N, number of patients; OAD, oral antidiabetic drug; SD, standard deviation; SGLT-2i, sodium-glucose cotransporter-2 inhibitor; SU, sulfonylurea.

**Table S11. Time to inadequate glycemic control and time to premature treatment discontinuation with liraglutide versus *post hoc* OAD subgroups<sup>†</sup>**

| Endpoint                                                       | Liraglutide<br>(N=996) | SGLT-2i<br>(N=471) | DPP-4i<br>(N=391) | SU<br>(N=106)    |
|----------------------------------------------------------------|------------------------|--------------------|-------------------|------------------|
| <b>Time to inadequate glycemic control</b>                     |                        |                    |                   |                  |
| Patients with event, N (%)                                     | 416 (41.8)             | 256 (54.4)         | 214 (54.7)        | 66 (62.3)        |
| Median (25 <sup>th</sup> ; 75 <sup>th</sup> percentile), weeks | 108.9 (37.7; n/a)      | 64.9 (35.1; n/a)   | 78.1 (35.4; n/a)  | 53.1 (36.6; n/a) |
| <b>Time to premature treatment discontinuation</b>             |                        |                    |                   |                  |
| Patients with event, N (%)                                     | 532 (53.4)             | 296 (62.8)         | 240 (61.4)        | 75 (70.8)        |
| Median (25 <sup>th</sup> ; 75 <sup>th</sup> percentile), weeks | 80.4 (35.7; n/a)       | 51.7 (35.1; n/a)   | 62.6 (35.4; n/a)  | 38.0 (35.9; n/a) |

<sup>†</sup>Both liraglutide and OADs were prescribed in combination with metformin. Full analysis set. The primary endpoint of time to inadequate glycemic control was defined as HbA<sub>1c</sub> >7.0% at two consecutive scheduled visits after the first 26 weeks of treatment and up to 104 weeks. The first possible occurrence was at Week 38. Time to inadequate glycemic control with liraglutide versus individual OADs was analyzed using a generalized log rank test for interval-censored failure time data. The analysis was not based on any model assumptions or adjusted for any covariates. Possible event times were considered as a continuous variable. Similar methods were used to analyze time to premature treatment discontinuation. 25%, median (50%) and 75% percentiles for the cumulative distribution function were obtained from the Kaplan-Meier survival function. Some 75% percentiles were not estimated as the trial ended after the 104-week treatment period and 1-week follow-up period. DPP-4i, dipeptidyl peptidase-4 inhibitor; N, number of patients; n/a, not applicable; OAD, oral antidiabetic drug; SGLT-2i, sodium-glucose cotransporter-2 inhibitor; SU, sulfonylurea.

**Table S12. HbA<sub>1c</sub> and body weight values and changes from baseline at Week 104 or at premature treatment discontinuation in liraglutide and *post hoc* OAD subgroups**

|                                                           | <b>Liraglutide</b> | <b>SGLT-2i</b>       | <b>DPP-4i</b>        | <b>SU</b>            |
|-----------------------------------------------------------|--------------------|----------------------|----------------------|----------------------|
| Full analysis set, N                                      | 996                | 471                  | 391                  | 106                  |
| <b>HbA<sub>1c</sub> (%)</b>                               |                    |                      |                      |                      |
| N                                                         | 872                | 431                  | 352                  | 100                  |
| Estimated LS mean (SE)                                    | 7.17 (0.036)       | 7.30 (0.051)         | 7.66 (0.057)         | 7.71 (0.106)         |
| Estimated LS mean (SE) change from baseline               | -0.99 (0.036)      | -0.85 (0.051)        | -0.50 (0.057)        | -0.45 (0.106)        |
| Estimated liraglutide – OAD treatment difference (95% CI) | n/a                | -0.14 (-0.26; -0.01) | -0.49 (-0.62; -0.36) | -0.54 (-0.76; -0.32) |
| <b>HbA<sub>1c</sub> (mmol/mol)</b>                        |                    |                      |                      |                      |
| N                                                         | 872                | 431                  | 352                  | 100                  |
| Estimated LS mean (SE)                                    | 54.83 (0.393)      | 56.33 (0.560)        | 60.20 (0.622)        | 60.75 (1.163)        |
| Estimated LS mean (SE) change from baseline               | -10.80 (0.393)     | -9.30 (0.560)        | -5.43 (0.622)        | -4.88 (1.163)        |
| Estimated liraglutide – OAD treatment difference (95% CI) | n/a                | -1.49 (-2.84; -0.15) | -5.37 (-6.81; -3.92) | -5.92 (-8.32; -3.51) |
| <b>Body weight (kg)</b>                                   |                    |                      |                      |                      |
| N                                                         | 930                | 460                  | 376                  | 103                  |
| Estimated LS mean (SE)                                    | 92.40 (0.162)      | 91.43 (0.232)        | 94.09 (0.256)        | 95.64 (0.489)        |
| Estimated LS mean (SE) change from baseline               | -2.80 (0.162)      | -3.78 (0.232)        | -1.11 (0.256)        | 0.43 (0.489)         |
| Estimated liraglutide – OAD treatment difference (95% CI) | n/a                | 0.97 (0.42; 1.53)    | -1.69 (-2.29; -1.10) | -3.24 (-4.25; -2.23) |

Both liraglutide and OADs were prescribed in combination with metformin. Full analysis set. Changes from baseline in HbA<sub>1c</sub> and body weight at Week 104 or at premature treatment discontinuation were analyzed using an analysis of covariance model with treatment and country as fixed factors and the baseline value of the variable of interest as a covariate. Estimated differences between liraglutide and individual OADs were calculated, together with 95% CIs. CI, confidence interval; DPP-4i, dipeptidyl peptidase-4 inhibitor; HbA<sub>1c</sub>, glycated hemoglobin; LS, least squares; N, number of patients contributing to the analysis; n/a, not applicable; OAD, oral antidiabetic drug; SE, standard error of the mean; SGLT-2i, sodium-glucose cotransporter-2 inhibitor; SU, sulfonylurea

**Table S13. Treatment-emergent hypoglycemic episodes in liraglutide and *post hoc* OAD subgroups**

|                                    | Liraglutide |      |     |       | SGLT-2i |     |    |      | DPP-4i |     |    |       | SU  |      |     |        |
|------------------------------------|-------------|------|-----|-------|---------|-----|----|------|--------|-----|----|-------|-----|------|-----|--------|
|                                    | N           | %    | E   | R     | N       | %   | E  | R    | N      | %   | E  | R     | N   | %    | E   | R      |
| Safety analysis set                | 980         |      |     |       | 471     |     |    |      | 391    |     |    |       | 106 |      |     |        |
| Events                             | 113         | 11.5 | 224 | 165.3 | 32      | 6.8 | 42 | 70.2 | 34     | 8.7 | 72 | 140.3 | 34  | 32.1 | 200 | 1566.3 |
| Severe or BG-confirmed symptomatic | 18          | 1.8  | 24  | 17.7  | 4       | 0.8 | 4  | 6.7  | 5      | 1.3 | 6  | 11.7  | 12  | 11.3 | 34  | 266.3  |
| Severe or BG-confirmed             | 26          | 2.7  | 32  | 23.6  | 7       | 1.5 | 7  | 11.7 | 7      | 1.8 | 8  | 15.6  | 13  | 12.3 | 37  | 289.8  |
| ADA classification                 |             |      |     |       |         |     |    |      |        |     |    |       |     |      |     |        |
| Severe                             | 1           | 0.1  | 1   | 0.7   | 2       | 0.4 | 2  | 3.3  | 2      | 0.5 | 2  | 3.9   | 2   | 1.9  | 2   | 15.7   |
| Asymptomatic                       | 38          | 3.9  | 47  | 34.7  | 11      | 2.3 | 16 | 26.8 | 14     | 3.6 | 32 | 62.3  | 12  | 11.3 | 52  | 407.2  |
| Documented symptomatic             | 50          | 5.1  | 98  | 72.3  | 11      | 2.3 | 14 | 23.4 | 17     | 4.3 | 28 | 54.5  | 24  | 22.6 | 112 | 877.1  |
| Pseudo                             | 24          | 2.4  | 31  | 22.9  | 4       | 0.8 | 5  | 8.4  | 5      | 1.3 | 8  | 15.6  | 8   | 7.5  | 19  | 148.8  |
| Probable symptomatic               | 32          | 3.3  | 45  | 33.2  | 5       | 1.1 | 5  | 8.4  | 2      | 0.5 | 2  | 3.9   | 6   | 5.7  | 14  | 109.6  |
| Unclassifiable                     | 1           | 0.1  | 2   | 1.5   | 0       |     |    |      | 0      |     |    |       | 1   | 0.9  | 1   | 7.8    |

Both liraglutide and OADs were prescribed in combination with metformin. Safety analysis set. A treatment-emergent hypoglycemic event was defined as an event with an onset date on or after the first day of trial product administration, and no later than the day after the last trial product administration. Prespecified endpoints involving hypoglycemic episodes are listed in the main manuscript. ADA, American Diabetes Association; BG, blood glucose; DPP-4i, dipeptidyl peptidase-4 inhibitor; E, number of events; N, number of patients with  $\geq 1$  event; OAD, oral antidiabetic drug; R, rate (number of events divided by patient-years of exposure multiplied by 1000); SGLT-2i, sodium-glucose cotransporter-2 inhibitor; SU, sulfonylurea; %, percentage of patients with  $\geq 1$  event.

**Table S14. Treatment-emergent adverse events (serious, fatal, leading to permanent discontinuation and events of special interest) in liraglutide and *post hoc* OAD subgroups**

|                                      | Liraglutide |     |     |       | SGLT-2i |     |    |       | DPP-4i |     |    |       | SU  |      |    |       |
|--------------------------------------|-------------|-----|-----|-------|---------|-----|----|-------|--------|-----|----|-------|-----|------|----|-------|
|                                      | N           | %   | E   | R     | N       | %   | E  | R     | N      | %   | E  | R     | N   | %    | E  | R     |
| Safety analysis set                  | 980         |     |     |       | 471     |     |    |       | 391    |     |    |       | 106 |      |    |       |
| Serious                              | 92          | 9.4 | 145 | 107.0 | 33      | 7.0 | 61 | 102.0 | 31     | 7.9 | 56 | 109.1 | 14  | 13.2 | 20 | 156.6 |
| Fatal                                | 0           |     |     |       | 3       | 0.6 | 3  | 5.0   | 2      | 0.5 | 2  | 3.9   | 0   |      |    |       |
| Leading to permanent discontinuation | 77          | 7.9 | 188 | 138.7 | 24      | 5.1 | 47 | 78.6  | 14     | 3.6 | 48 | 93.5  | 1   | 0.9  | 1  | 7.8   |

Both liraglutide and OADs were prescribed in combination with metformin. Safety analysis set. A treatment-emergent adverse event was defined as an event with onset or increase in severity on or after the time of first trial product administration and no later than seven days (7 times 24 hours) after the time of last trial product administration. DPP-4i, dipeptidyl peptidase-4 inhibitor; E, number of events; N, number of patients with  $\geq 1$  event; OAD, oral antidiabetic drug; R, rate (number of events divided by patient-years of exposure multiplied by 1000); SGLT-2i, sodium-glucose cotransporter-2 inhibitor; SU, sulfonylurea; %, percentage of patients with  $\geq 1$  event.

## List of LIRA-PRIME investigators

Canada: Dennis O'Keefe, Commonwealth Medical Clinic; Murdo Ferguson, Colchester Research Group; Derek Lowe, Ocean West Research Clinic, South Surrey Medical Clinic; Anil Gupta, Anil K Gupta Medicine Professional Corporation; Ronald Akhras, Centre Medical Acadie; Sean Peterson; Bluewater Clinical Research; Guy Chouinard, Dr. Guy Chouinard; Sameh Fikry, S. Fikry Medicine Professional Corporation; Richard Tytus, Hamilton Medicine Research Group; David Crowley, DCTM Clinical Trials Group Inc.; Pierre Filteau, Centre Médical des Carrières.

Colombia: Sandra Barrera Silva, CAFAM; Alexander Gonzalez, BlueCare Salud S.A.S.; Luis Gomez-Botero, I.P.S. de Salud Universidad de Antioquia.

India: Ghanshyam Pangtey, Lady Hardinge Medical College; S. Prabhu, Victoria Hospital, Bangalore Medical College and Research Ins; Pooja Khosla, Sir Ganga Ram Hospital; Arun Narayan, M S Ramaiah Memorial Hospital; Anil Awasthi, Ajanta Research Centre; Rohan Sequeria, St George Hospital; Reema Kashiva, Noble Hospitals Pvt Ltd; Jayant K. Panda, S.C.B. Medical College; K. N. Manohar, Manipal Hospital; Ashwini Joshi, Deenanath Mangeshkar Hospital and Research Centre; Ajay Agarwal, Fortis Hospital Noida; S. S. Ramesh, Mysore Medical College and Research Institute; Sanjay Agarwal, Grant Medical Foundation; Dipti Chand, Government Medical College and Hospital; Dinesh Jain, Dayanand Medical College & Hospital; Ram Kaulgud, Karnataka Institute of Medical Sciences.

Latvia: Arija Lace, Adoria; Laila Kudule, Kudule Laila GP Practise at MFD Health Centre “Dziednieciba”.

Lebanon: Georges Bou Haidar, Mount Lebanon Hospital; Marwan Zoghbi, Middle East Institute of Health; Rania Sakr, Lebanese American University Medical Center; Grace Abi Rizk, Bellevue Medical Center.

Russia: Elena Smolyarchuk, Scientific Clinical Centre OAO “RZD”; Tatiana Stepanova, Clinic of Modern Medicine; Albina Golovach, LLC “Clinic of new technologies in Medicine”; Ruslan Sardinov, Saint-Petersburg “City Polyclinic #74”; Sergey Martsevich, State Research Centre of Preventive Medicine.

Serbia: Branka Djuric-Pejovic, Healthcare Centre Zeleznice; Svetlana Manojlovic-Kulovic, Healthcare Centre Zvezdara; Jelena Bajic, Healthcare Centre Novi Sad; Danica Bacanin-Jovanovic, Healthcare Centre Kragujevac; Snezana Stojilkovic, Healthcare Centre Nis; Ivan Kostic, Healthcare Centre Nis.

Turkey: Mehmet Sargin, Goztepe Egitim ve Arastirma Hastanesi; Burcu Dogan, Sakarya Egitim ve Arastirma Hastanesi Korucuk Kampusu; Mehmet Burak Aktuglu, Haseki Egitim ve Arastirma Hastanesi; Ozlem Cigerli, Baskent University Istanbul Health Practise & Training Center.

United States: Marshall Anderson, Kernodle Clinic Depart of the Private Diagnostic Clinic PLLC; William Byars, Mountain View Clinical Research Inc.; David Butuk, Solaris Clinical Research; Kenneth Cohen, New West Physicians Inc.; Alexander Dela Llana, MediSphere Medical Research Center LLC; Ankur Doshi, PrimeCare Medical Group; Bryan Feldman, Central Ohio Clinical Research LLC; Neil Fraser, Arcturus Healthcare PLC, Mitzie Hewitt, Northern Pines Health Center, PC; Michael Lillestol, Lillestol Research LLC; Robert Hippert, Penn State Health St. Joseph Clinical Research; Sashi Makam, Mid Hudson Medical Research PLLC; Stuart Stoller, Tri-County Research Inc.; Lawrence Allen, Synexus Clinical Research US Inc./Diagnostic Center of Med; Richard Beasley, Health Concepts; Ramin Farsad, Diagnostics Inc.; Dr Horacio Hidalgo, Langhorne Physician Services Durham Physicians; Michael Soboeiro, WakeMed Garner Healthplex- Garner Primary Care; Kenneth Blaze, South Broward Research LLC; William Simon, Professional Research Network

of Kansas LLC; Eric Dedeke, Integris Family Care Northwest; Brian Everhart, Heritage Valley Medical Group Inc.; Michelle Look, San Diego Sports Medicine and Family Health Center; James Kahrs, Heartland Research Associates LLC; Melissa Poindexter, Albuquerque Clinical Trials Inc.; Stephen Falkowski, Southeast Clinical Research; Clancy Cone, Montana Medical Research; Charles Crump, Chattanooga Medical Research LLC, Richard Jackson, Dominion Medical Associates; Augusto Focil, Format Medical Research; Terence Hart, Terence Hart; Brent Hella, Valley Weight Loss Clinic; Susan Kemp, Grace Research LLC; Cesar Albarracin, Padre Coast Clinical Research; Martin Schear, Dayton Clinical Research; Dwayne Williams, Dwayne O. Williams, M.D., P.A.; John Willis, San Gabriel Clinical Research; Thomas Wolf, Synexus Clinical Research US Inc.; Jennifer Bellucci-Jackson, Clinical Investigation Specialists Inc.; Jonathan Condit, American Health Network of IN LLC; Munib Daudjee, East Montgomery County Clinic; Robert Detweiler, Detweiler Family Med; Michael DiGiovanna, DiGiovanna Institute for Medical Education & Research; Neil Farris, The Research Group of Lexington LLC; Matthew Finneran, Family Practice Center of Wadsworth Inc.; Frank Fusco, Renstar Medical Research; Peter Gagianas, Primary Care Research South Inc.; Sidney Gorton, Belzoni Clinical Research; Marvin Heuer, Heuer Research Inc.; Mr. Jose Alvarez, A & O Research Center; Gary Korff, Cassidy Medical Group; Joseph Lomboy, Middle Georgia Clinical Research Center LLC; Richard Lorraine, Harleysville Medical Associates; Charles Lovell, York Clinical Research LLC; Caroline Mbogua, Discovery MM Services Inc.; Deirdre McMullen, Discovery MMS Services Inc; Richard Murphy, Murphy Research Center; Henry Naddaf, Toledo Clinic; Thomas O'Connor, American Health Network of Indiana LLC; Stephen Ong, MD Medical Research; Bryce Palchick, Preferred Primary Care Physicians; David Pham, Allianz Research Institute Inc.; Marina Raikhel, Torrance Clinical Research Institute Inc.; Mercedes Samson, American Clinical Trials; Horia Tatu, Romedica LLC; Henry Traylor, Whiteville Medical Associates, PA; Jeffrey Unger, Catalina Research Institute LLC; Dave Webster, TEAM Research; Kathleen Harris, DCOL Center for Clinical Research; Steven Bauer, OnSite Clinical Solutions LLC; Gary Bedel, Prestige Clinical Research; Mark Benson, American Health Network of Indiana LLC; Isaac Beshay, FDRG; Rafael Canadas, Galenos Research; Cathy Hurley, Sante Clinical Research; Thomas Davis, Integrated Research of Inland Inc.; H. Jackson Downey, Westside Center For Clinical Research; Gregory Haase, Tidewater Integrated Medical Research; Lee Herman, Herman Clinical Research LLC; Moises Issa, Clinical Research of Hollywood; Randal Jacks, Hill Country Medical Associates; Curtis Jantzi, Holston Medical Group; David Johnson, Searcy Medical Center-Unity Health; Ted Kubicki, Sentara Family Medicine Physicians First Colonial; Reginald Parker, Amistad Clinical Research Center LLC; Raman Purighalla, Preferred Primary Care Physicians Inc.; Thaddeus Riley, Family Health Care Center; Gildardo Ceballos, Med-Olam Clinical Research LLC; Robert Schreiman, New Foundation Medical Group Clinical Trials; Robert Scott, Asheboro Research Associates; Matthew Lewis, Synexus Clinical Research US Inc. / Mile High Primary Care; Amit Shah, Piedmont Research Partners LLC; Charles Sharpe, Athens Medical Group; Kanagaratnam Sivalingam, First Valley Medical Group; Stephen Smith, Burke Primary Care; Joseph Woolley, Chrysalis Clinical Research; Dilawar Ajani, Southwest Clinical Trials; Eric Ball, Walla Walla Clinic; Daniel Schlosser, Synexus Clinical Research US Inc./Summit Medical Group Arizo; Elmer Stout, Crossroads Clinical Research Inc.; Moshir Jacob, Toledo Clinic; Dale C. Allison, Hillcrest Family Health Center; Bradley Block, Oviedo Medical Research LLC; Wilfred McKenzie, M&O Clinical Research LLC; Carl Meisner, Carl R. Meisner Medical Clinic PLLC; Timothy Kitchen, Great Lakes Medical Research; Daniel Koontz, Palmetto Institute Of Clinical Research Inc.; Joseph Labuda II, Preferred Primary Care Physicians Inc.; Howard Wenocur, Tristar Clinical Investigations, P.C.; Robert Broker, Hillcrest Clinical Research LLC / Hillcrest Family Practice; Zeeshan Shaikh, Southwest Urgent Care and Family practice; Marcy Goisse, Montgomery Medical Inc.; David Headley, David M. Headley, MD P.A.; Elba Perez-Vargas, San Miguel Medical; Christopher Chow, Valley Clinical Trials Inc.; Alex Guevara, Rockwood Medical Clinic; Ralph Wade, Wade Family Medicine; John Sibille, Sunset Medical Research; Dr Ajit Shah, Medvin Clinical Research; Kenneth Fox, Family Medical Assoc; Vonda Houchin, Harrisburg Family Medical Clinic; John Sensenbrenner, Sensenbrenner Primary Care; Boyde Harrison, Haleyville Clinical Research LLC; Otis Barnum, Barnum Medical Research Inc.; Bruce Weber, Macoupin Research Group; Joseph Risser, San Diego Family Care; Steven Barag, Rancho Cucamonga Clinical Research; Anita Mercado, Stewart Medical Group; Royce Solano, DaVita Medical Group Colorado Springs LLC.; Steve Simpson, Applied Research Center of Arkansas; Kari Uusinarkaus, DaVita Medical Group Colorado Springs LLC; Jose Burbano, Texas Health Physicians Group; Richard Glover, Heartland Research Associates LLC; Ciro Reyes, Reyes Clinical Research Inc.; Julian Gonzalez, CliniCore International; C. Sofley, Internal Medicine Associates of Anderson; Timothy Dao, HIRG, Health Innovation Research Group; Michael Winnie, Corpus Christi Family Wellness Center; Howard Ellison, Rockdale Medical Research Associates; Tarek Hassanein, Southern California Research Center; Govinda Lohani, Lohani Clinical Research; Jon McRae, Bainbridge Medical Associates; Fadi Saba, Professional Health Care of Pinellas; James Shoemaker, Ormond Medical Arts Family; Kelly Taylor, Sensible Healthcare; Miguel Trevino, Innovative Research of W Florida Inc.; Hernan Salazar, HAS Research; Irene Sobolevsky, Kelsey-

Seybold Clinic; Daniel Pomposini, Spectrum Medical Inc.; Garth Vaz, TVC Clinical Research; Mark Fredrick, HealthCare Partners; Larry Berman, OnSite Clinical Solutions LLC; Gregory Allen, Center for Medical Research; Maja Delibasic, Mercy Hospital and Medical Center; Carl Griffin, Lynn Health Science Institute; Bram Wieskopf, North Georgia Clinical Research; Aron Schlau, Palm Harbor Medical Center; Wayne Reynolds, Sentara Medical Group; S. Michael Sutton, Sentara Medical Group; Allen Geltzer, Synexus Clinical Research US, INC / Overlake Internal Medici; Matthew Hummel, Synexus Clinical Research US Inc./Fountain Hills Family Pra; Thomas Fiel, Tempe Primary Care Associates PC; Scott Kaiser, Clinix Health Services; David Francyk, Synexus Clinical Research US Inc./Family Practice Specialis; Kevin Pounds, Synexus Clinical Research, Inc - Orange Grove Family Practic; William Kirby, Synexus Clinical Research US Inc./Simon Williamson Clinic; Peter Levins, Synexus Clinical Research US Inc./Tatum Highlands Medical A; Gregston Nelson, Primary Care Physicians/Radiant Research Inc.
